# Supplementary material
Source: PubMed Central journal article supplement (PMC3430348)
Supplement: JB.00932-12_zjb999091922so1.pdf [file JB.00932-12_zjb999091922so1.pdf]

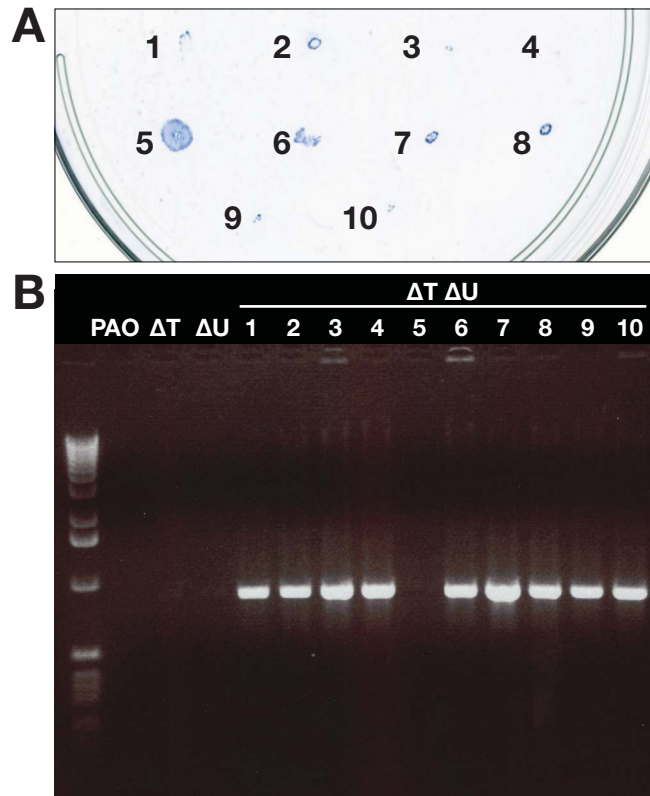

**FIG. S1.** Twitching motility (A) and production of the replicative form of PF4 (B) by ten independent  $\Delta mvaT \Delta mvaU$  double mutants of *P. aeruginosa* strain PAO1. (A) The ten independent PAO1  $\Delta mvaT \Delta mvaU$  double mutants are numbered 1-10. (B) Agarose gel of PCR products amplified from the replicative form of phage Pf4 present in the indicated cells. PCR products from the ten independent PAO1  $\Delta mvaT \Delta mvaU$  double mutants are numbered 1-10 and indicated  $\Delta T \Delta U$ . PCR products from the wild-type PAO1 strain, from a  $\Delta mvaT$  mutant strain and from a  $\Delta mvaU$  mutant strain are indicated PAO,  $\Delta T$ , and  $\Delta U$ , respectively. The results in A show that all mutants, except number 5, are defective for twitching motility. The results in B show that all mutants, except number 5, overproduce the replicative form of Pf4.
